# Supplementary material for: Robust and bias-free localization of individual fixed dipole emitters achieving the Cramér Rao bound for applications in cryo-single molecule localization microscopy
Source: PubMed Central journal article supplement (PMC8815875; doi:10.1371/journal.pone.0263500), 2022-02-04
Supplement: pone.0263500.s001.pdf [file pone.0263500.s001.pdf]

# Supplementary Information

## **Robust and bias-free localization of individual fixed dipole emitters achieving the Cramér Rao bound for applications in cryo-single molecule localization microscopy**

Fabian Hinterer<sup>1+</sup>, Magdalena C. Schneider<sup>2+</sup>, Simon Hubmer<sup>3</sup>, Montserrat López-Martinez<sup>2</sup>, Philipp Zelger<sup>4</sup>, Alexander Jesacher<sup>4</sup>, Ronny Ramlau<sup>1\*</sup>, and Gerhard J. Schütz<sup>2\*</sup>

<sup>1</sup>Institute of Industrial Mathematics, Johannes Kepler University Linz, Linz, Austria

<sup>2</sup>Institute of Applied Physics, TU Wien, Vienna, Austria

<sup>3</sup>Johann Radon Institute Linz, Linz, Austria

<sup>4</sup>Division for Biomedical Physics, Medical University of Innsbruck, Innsbruck, Austria

\*ronny.ramlau@jku.at (RR), schuetz@iap.tuwien.ac.at (GJS)

+these authors contributed equally to this work

| Fig. | $\phi$     | Astigm. | N                            | Reduced excitation | b      | Angle noise $\theta$ | Angle noise $\phi$ | Pixel size | ROI            |
|------|------------|---------|------------------------------|--------------------|--------|----------------------|--------------------|------------|----------------|
| 1    | $0, \pi/4$ | no      | $5 \cdot 10^5$               | no                 | 0      | —                    | —                  | 108 nm     | $25 \times 25$ |
| 2    | $\pi/4$    | no      | $5 \cdot 10^5$               | no                 | 300    | $0^\circ$            | $0^\circ$          | 108 nm     | $17 \times 17$ |
| 3    | $\pi/4$    | yes     | $5 \cdot 10^5$               | no                 | 100    | $0^\circ$            | $0^\circ$          | 108 nm     | $17 \times 17$ |
| 4    | $\pi/4$    | yes     | $5 \cdot 10^5$               | no                 | 0      | $0^\circ$            | $0^\circ$          | 108 nm     | $17 \times 17$ |
| 5    | $\pi/4$    | yes     | $5 \cdot 10^5$               | no                 | 100    | $0^\circ$            | $0^\circ$          | 108 nm     | $17 \times 17$ |
| 6    | $\pi/4$    | yes     | $5 \cdot 10^5$               | no                 | 0, 300 | $0^\circ$            | $0^\circ$          | 108 nm     | various        |
| 7    | $\pi/4$    | yes     | $5 \cdot 10^5$               | no                 | 100    | $2^\circ$            | $2^\circ$          | 108 nm     | $17 \times 17$ |
| 8    | $\pi/4$    | yes     | $5 \cdot 10^5$               | yes                | 100    | $2^\circ$            | $2^\circ$          | 108 nm     | $17 \times 17$ |
| S1   | $\pi/4$    | yes     | $5 \cdot 10^5$               | no                 | 0      | $0^\circ$            | $0^\circ$          | 108 nm     | $17 \times 17$ |
| S2   | $\pi/4$    | no      | $5 \cdot 10^5$               | no                 | 100    | $0^\circ$            | $0^\circ$          | 108 nm     | $17 \times 17$ |
| S3   | 0          | yes     | $5 \cdot 10^5$               | no                 | 0      | $0^\circ$            | $0^\circ$          | 108 nm     | $17 \times 17$ |
| S4   | $\pi/4$    | yes     | $5 \cdot 10^4, 5 \cdot 10^3$ | no                 | 0      | $0^\circ$            | $0^\circ$          | 108 nm     | $17 \times 17$ |
| S5   | $\pi/4$    | yes     | $5 \cdot 10^5$               | no                 | 0      | $0^\circ$            | $0^\circ$          | 216 nm     | $17 \times 17$ |
| S6   | $\pi/4$    | yes     | $5 \cdot 10^5$               | no                 | 300    | $0^\circ$            | $0^\circ$          | 108 nm     | $17 \times 17$ |
| S7   | $\pi/4$    | yes     | $5 \cdot 10^5$               | no                 | 300    | $2^\circ$            | $2^\circ$          | 108 nm     | $17 \times 17$ |
| S8   | $\pi/4$    | yes     | $5 \cdot 10^5$               | no                 | 100    | $4^\circ$            | $2^\circ$          | 108 nm     | $17 \times 17$ |
| S9   | $\pi/4$    | yes     | $5 \cdot 10^5$               | no                 | 300    | $4^\circ$            | $2^\circ$          | 108 nm     | $17 \times 17$ |
| S10  | $\pi/4$    | yes     | $5 \cdot 10^5$               | yes                | 0      | $0^\circ$            | $0^\circ$          | 108 nm     | $17 \times 17$ |

**Table S1**

**Table of simulation parameters.** The inclination angle was set to  $\theta = \pi/2, \pi/3, \pi/6, 0$ . If not mentioned otherwise, 1000 simulations per data point were performed. Columns: Figure number,  $\phi$  azimuthal angle, astigmatism,  $N$  number of photons, reduced excitation,  $b$  background noise, standard deviation of estimation of  $\theta$ , standard deviation of estimation of  $\phi$ , pixel size, region of interest for fit.

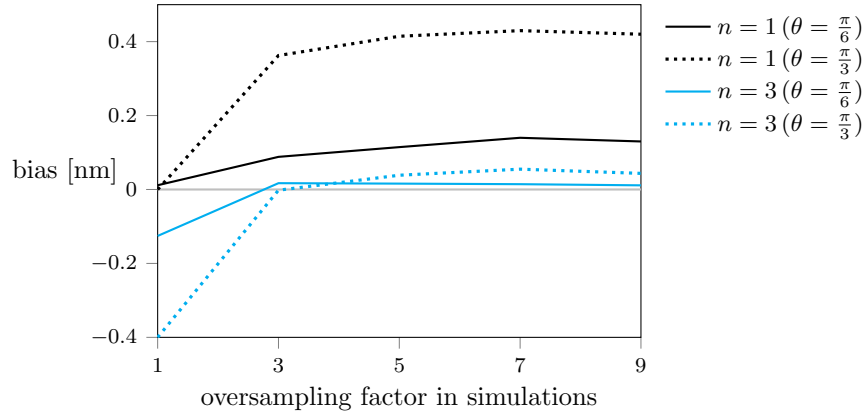

**Figure S1**

**Discretization of the PSF.** Localization bias arising from the choice of the oversampling factor in the calculation of the PSF. An oversampling factor of 1 corresponds to the PSF being evaluated at the discrete positions of the camera pixels. For larger oversampling factors, the PSF was evaluated on a finer grid, and resulting subpixel values were subsequently summed up. The x-axis shows the oversampling factor used for the simulation of the PSF. For the fitting, we used a PSF model calculated with an oversampling factor of  $n$  (black lines indicate  $n = 1$ , and blue lines  $n = 3$ ). The defocus was set to  $d = -500$  nm. Each data point represents 1500 simulations. A list of the remaining simulation parameters is given in Table S1.

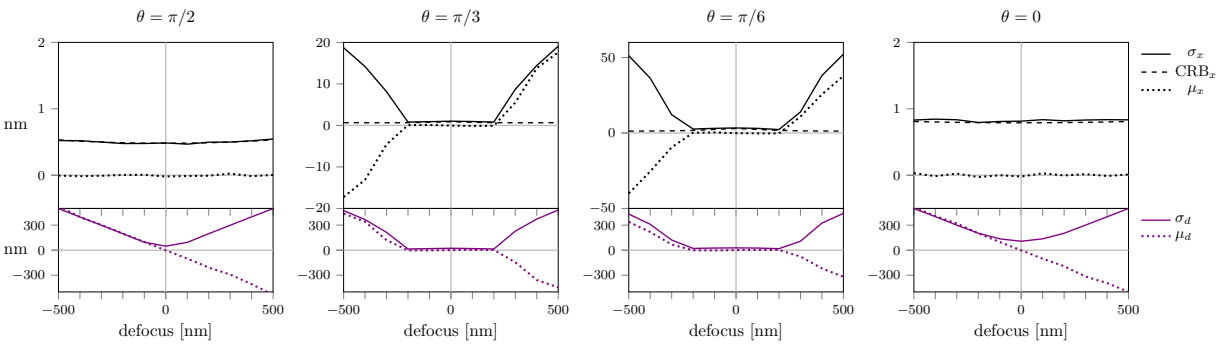

**Figure S2**

**Localization errors without astigmatism.** All parameters were identical to Fig. 2, except background noise, which was reduced to  $b = 100$ . A list of all simulation parameters is given in Table S1.

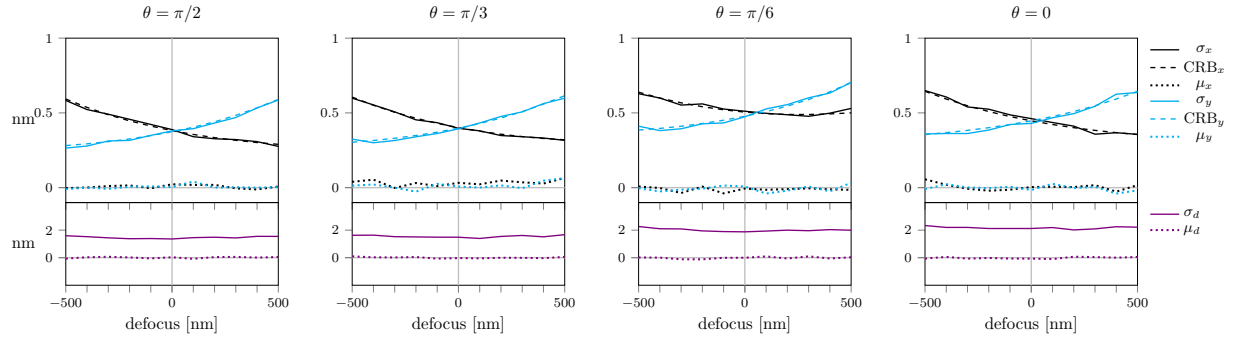

**Figure S3**

**Localization errors in the presence of astigmatism.** We fitted the position and defocus  $(x, y, d)$ , while the dipole orientation  $(\theta, \phi)$  was assumed to be known exactly. All parameters were identical to Fig. 4, except for the azimuthal angle, which was set to  $\phi = 0$ . A list of all simulation parameters is given in Table S1.

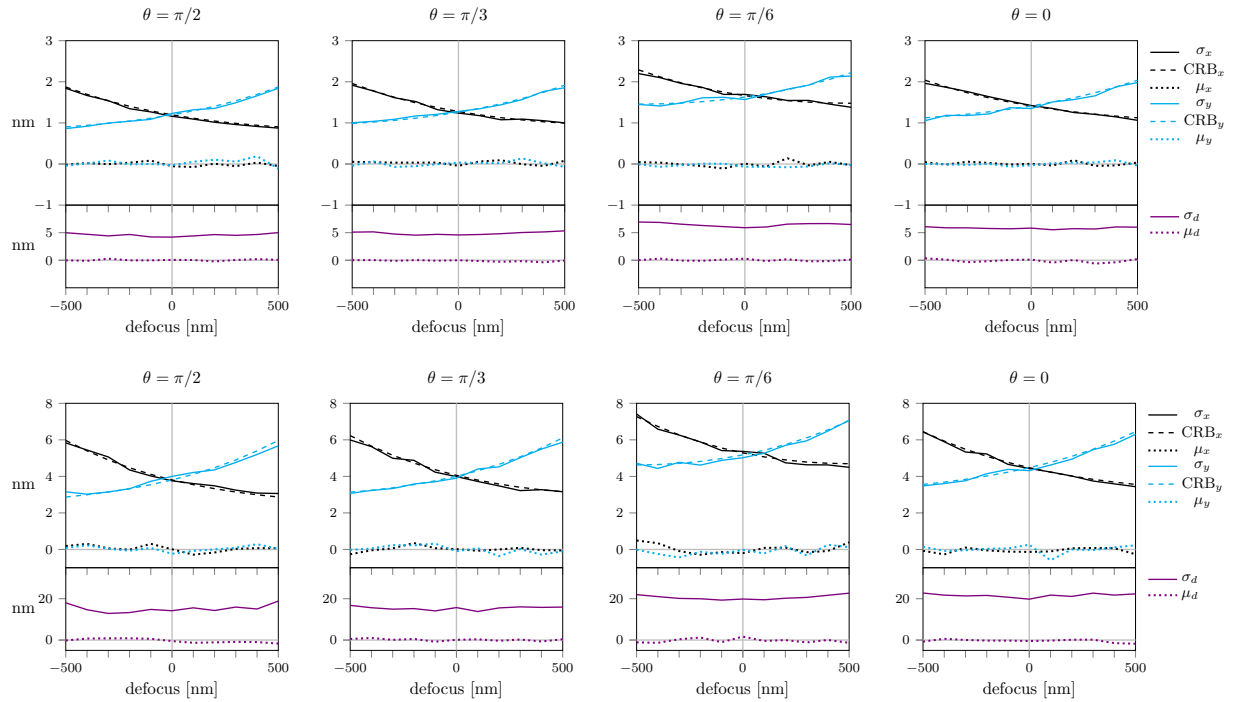

**Figure S4**

**Localization errors in the presence of astigmatism.** We fitted the position and defocus  $(x, y, d)$ , while the dipole orientation  $(\theta, \phi)$  was assumed to be known exactly. All parameters were identical to Fig. 4, except for the photon number, which was reduced to  $5 \cdot 10^4$  (first row) and further to  $5 \cdot 10^3$  (second row). A list of all simulation parameters is given in Table S1.

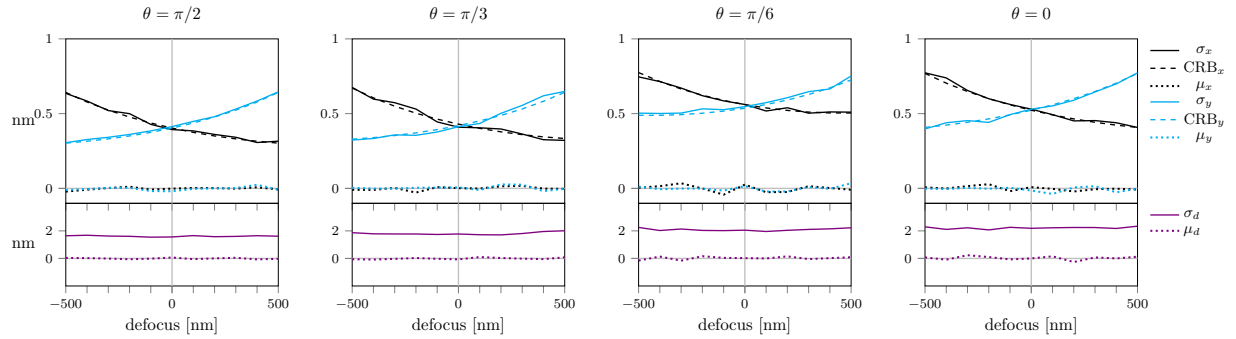

**Figure S5**

**Influence of pixel size.** All simulation parameters and the fitting procedure were identical to Fig. 4, except for the simulated pixel size, which was set to 216 nm. A list of all simulation parameters is given in Table S1.

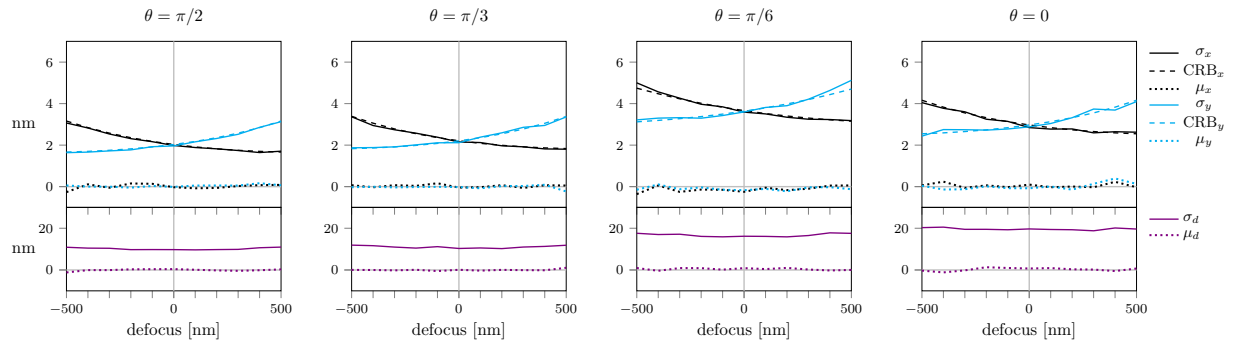

**Figure S6**

**Influence of background noise.** All simulation parameters and the fitting procedure were identical to Fig. 4, except for assuming background noise with  $b = 300$ . A list of all simulation parameters is given in Table S1.

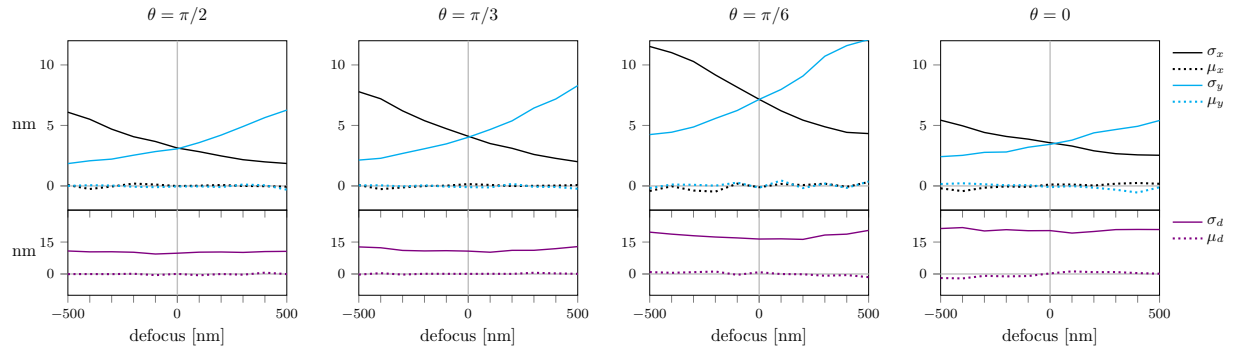

**Figure S7**

**Influence of uncertainties in dipole orientation.** Simulations and fitting procedure analogous to Fig. 4, except for a normal distribution of the error in orientation estimation with standard deviation of  $2^\circ$  for both  $\theta$  and  $\phi$ . Background noise was set to  $b = 300$ . A list of all simulation parameters is given in Table S1.

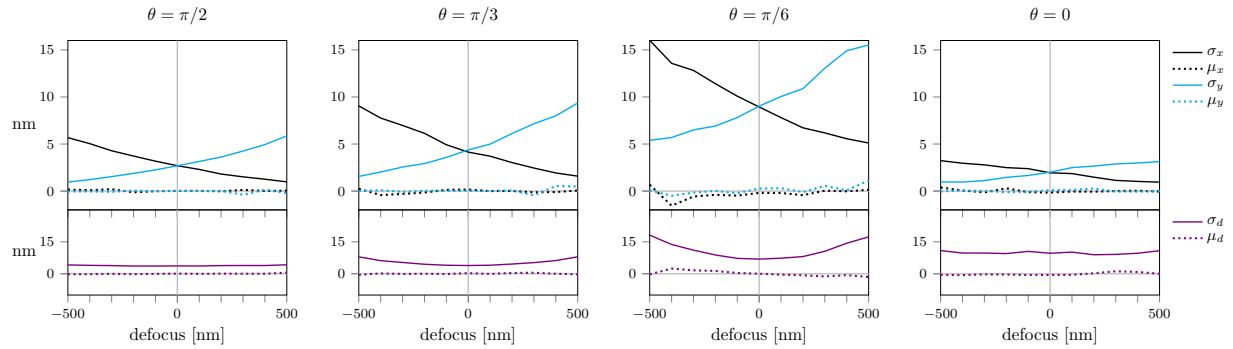

**Figure S8**

**Influence of uncertainties in dipole orientation.** Simulations and fitting procedure analogous to Fig. 4, except for a normal distribution of the error in orientation estimation with standard deviation of  $4^\circ$  in  $\theta$  and  $2^\circ$  in  $\phi$ . Background noise was set to  $b = 100$ . A list of all simulation parameters is given in Table S1.

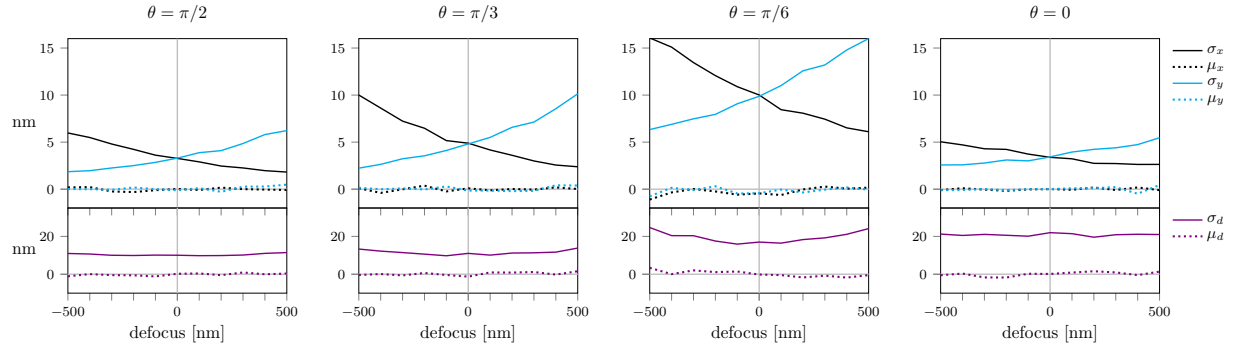

**Figure S9**

**Influence of uncertainties in dipole orientation.** Simulations and fitting procedure analogous to Fig. 4, except for a normal distribution of the error in orientation estimation with standard deviation of  $4^\circ$  in  $\theta$  and  $2^\circ$  in  $\phi$ . Background noise was set to  $b = 300$ . A list of all simulation parameters is given in Table S1.

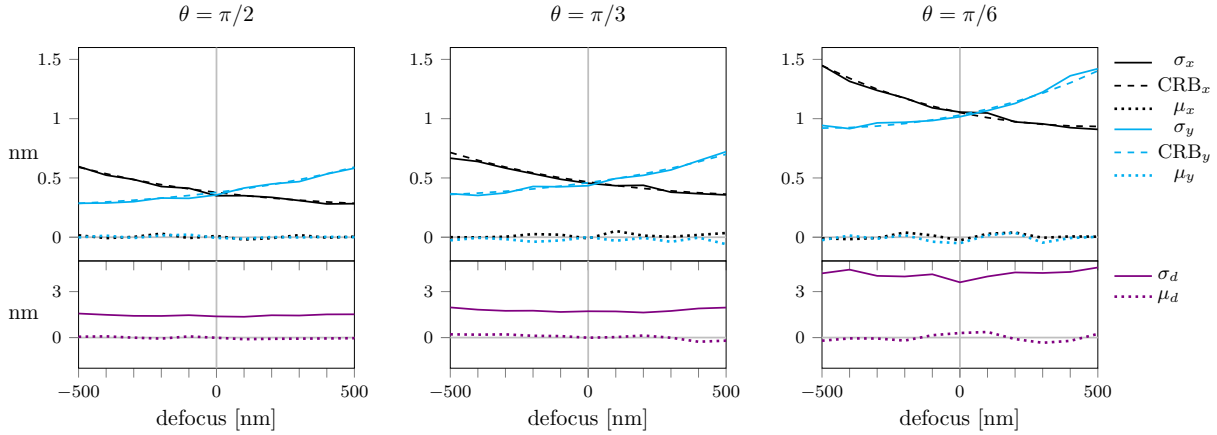

**Figure S10**

**Influence of reduced excitation probability for tilted dipoles.** Photon yield was adjusted depending on the dipole orientation with a maximum photon number of  $5 \cdot 10^5$ . The effective number of photons  $N_{\text{eff}}$  is indicated in each panel. The remaining parameters are identical to Fig. 4, of note background noise was set to  $b = 0$ . A list of all simulation parameters is given in Table S1.
